# Supplementary material for: Understanding the water molecule effect in metal-free B-based electrocatalysts for electrochemical CO2 reduction
Source: Royal Society of Chemistry journal article supplement (doi:10.1039/d1ta10127g), 2022-01-01
Supplement: d1ta10127g1.pdf [file d1ta10127g1.pdf]

## **Understanding the Water Molecule Effect in Metal-Free B-Based Electrocatalyst for Electrochemical CO<sub>2</sub> Reduction**

*Yuxiao Meng<sup>b</sup>, Zhangmeng Xu<sup>a</sup>, Zhangfeng Shen<sup>a</sup>, Qineng Xia<sup>a</sup>, Yongyong Cao<sup>\*a</sup>,  
Yangang Wang<sup>\*a</sup>, Xi Li<sup>\*a</sup>*

- a. College of Biological, Chemical Science and Engineering Jiaxing University,  
Jiaxing, Zhejiang, 314001 (P. R. China).*
- b. Institute of Industrial Catalysis, College of Chemical Engineering, State Key  
Laboratory Breeding Base of Green-Chemical Synthesis Technology, Zhejiang  
University of Technology, Hangzhou 310032 (P. R. China)*

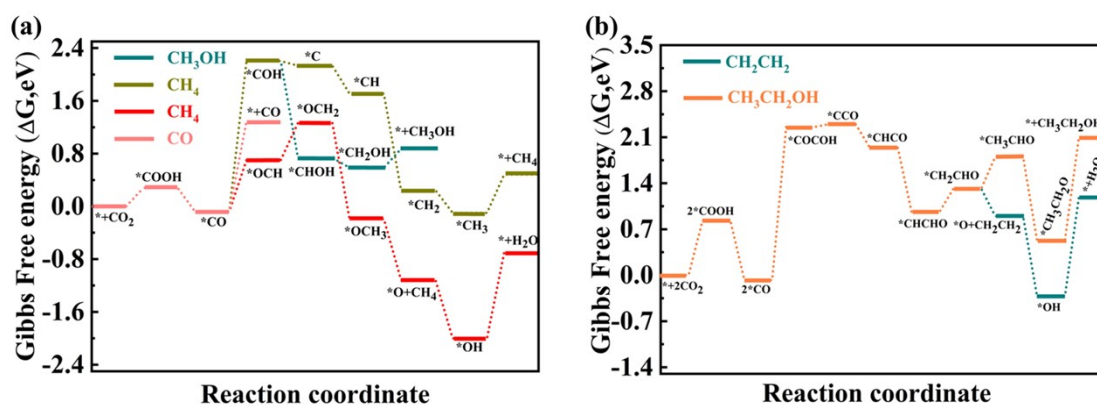

**Fig. S1** (a) The free energy diagram of the CO<sub>2</sub> reaction to CH<sub>3</sub>OH, CH<sub>4</sub> and CO on the B@Bi surface by RPBE functional. (b) The free energy diagram of the CO<sub>2</sub> reaction to CH<sub>2</sub>CH<sub>2</sub> and CH<sub>3</sub>CH<sub>2</sub>OH on the B<sub>2</sub>@Bi surface by RPBE functional.

All intermediates of the CO<sub>2</sub>RR pathways on B@Bi and B<sub>2</sub>@Bi catalysts were optimized using revised Perdew-Burke-Ernzerh (RPBE) functional. As shown in Fig. S1a and b, the first proton-electron transfer step to \*COOH formation with RPBE is energetically uphill by 0.28 eV on B@Bi, respectively. The \*CO intermediate would be further hydrogenated to form \*OCH species or \*COH intermediate, respectively. The energy barriers are 0.78 eV and 2.28 eV, respectively. Consequently, the \*OCH formation is more profitable than \*COH formation. Subsequently, the further hydrogenation of \*OCH to form \*OCH<sub>2</sub>, \*OCH<sub>3</sub> and \*O+CH<sub>4</sub> products. The reaction path for CH<sub>4</sub> formation is more favorable than CO and CH<sub>3</sub>OH on B@Bi catalyst and the rate-determining step is the \*OCH formation with an energy barrier of 0.78 eV. Similar to B@Bi catalyst, the adsorbed two CO<sub>2</sub> captures H proton and generates the intermediate \*COOH with energetically uphill of 0.83 eV. The \*COOH protonation process occurs to form the \*CO species by -0.91 eV. The \*COCO product can be formed following \*CO protonation and C-C coupling with a barrier of 2.33 eV. While the adsorbed CO<sub>2</sub> is still more likely to generate CH<sub>2</sub>CH<sub>2</sub> on the B<sub>2</sub>@Bi catalyst due to the steric hindrance make the \*CH<sub>2</sub>CH<sub>2</sub>O species formation energetically downhill by -0.42 eV. The generation of \*COCO is considered as the rate-determining step with a free energy value of 2.33 eV. The selectivity of the two pathways on B@Bi and

B<sub>2</sub>@Bi have been estimated by calculating the limit-potential. The results indicates that the trends of selectivity for products unaltered. The  $U_L$  value for the CH<sub>4</sub> formation by \*OCH hydrogenation is -0.78 V, while the value for the CH<sub>4</sub> and CH<sub>3</sub>OH products following \*COH hydrogenation is -2.28 V using RPBE functional. For B<sub>2</sub>@Bi catalyst, the  $U_L$  value for the CH<sub>2</sub>CH<sub>2</sub> and CH<sub>3</sub>CH<sub>2</sub>OH products is -2.33 V. As a result, the selective evaluation for CH<sub>4</sub> and CH<sub>2</sub>CH<sub>2</sub> products by RPBE functional are consistent with the PBE functional.

**Table S1.** The free energy difference of the elementary reaction by PBE and RPBE functional on B@Bi catalyst.

| Elementary steps                                                         | PBE/ $\Delta G$ (eV) | RPBE/ $\Delta G$ (eV) |
|--------------------------------------------------------------------------|----------------------|-----------------------|
| *+CO <sub>2</sub> +H <sup>+</sup> +e <sup>-</sup> → *COOH                | -0.46                | 0.28                  |
| *COOH+H <sup>+</sup> +e <sup>-</sup> → *CO+H <sub>2</sub> O              | -0.09                | -0.36                 |
| *CO+H <sup>+</sup> +e <sup>-</sup> → *COH                                | 2.23                 | 2.28                  |
| *COH+H <sup>+</sup> +e <sup>-</sup> → *C+H <sub>2</sub> O                | 0.16                 | -0.07                 |
| *C+H <sup>+</sup> +e <sup>-</sup> → *CH                                  | -0.36                | -0.42                 |
| *CH+H <sup>+</sup> +e <sup>-</sup> → *CH <sub>2</sub>                    | -1.39                | -1.47                 |
| *CH <sub>2</sub> +H <sup>+</sup> +e <sup>-</sup> → *CH <sub>3</sub>      | -0.25                | -0.34                 |
| *CH <sub>3</sub> +H <sup>+</sup> +e <sup>-</sup> → *CH <sub>4</sub>      | 0.67                 | 0.58                  |
| *COH+H <sup>+</sup> +e <sup>-</sup> → *CHOH                              | -1.39                | -1.46                 |
| *CHOH+H <sup>+</sup> +e <sup>-</sup> → *CH <sub>2</sub> OH               | -0.04                | -0.15                 |
| *CH <sub>2</sub> OH+H <sup>+</sup> +e <sup>-</sup> → *CH <sub>3</sub> OH | 0.28                 | 0.29                  |
| *CO+H <sup>+</sup> +e <sup>-</sup> → *OCH                                | 0.82                 | 0.78                  |
| *CHO+H <sup>+</sup> +e <sup>-</sup> → *OCH <sub>2</sub>                  | 0.61                 | 0.56                  |
| *CH <sub>2</sub> O+H <sup>+</sup> +e <sup>-</sup> → *OCH <sub>3</sub>    | -1.40                | -1.46                 |
| *CH <sub>3</sub> O+H <sup>+</sup> +e <sup>-</sup> → *OCH <sub>4</sub>    | -0.85                | -0.93                 |
| *O+H <sup>+</sup> +e <sup>-</sup> → *OH                                  | -0.80                | -0.88                 |

**Table S2.** The free energy difference of the elementary reaction by PBE and RPBE functional on B<sub>2</sub>@Bi catalyst.

| Elementary steps                                                                                        | PBE/ $\Delta G$ (eV) | RPBE/ $\Delta G$ (eV) |
|---------------------------------------------------------------------------------------------------------|----------------------|-----------------------|
| *+2CO <sub>2</sub> +2H <sup>+</sup> +2e <sup>-</sup> → 2*COOH                                           | -0.61                | 0.83                  |
| 2*COOH+2H <sup>+</sup> +2e <sup>-</sup> → 2*CO+2H <sub>2</sub> O                                        | -0.45                | -0.91                 |
| 2*CO+H <sup>+</sup> +e <sup>-</sup> → *COCO                                                             | 2.21                 | 2.33                  |
| *COCO+H <sup>+</sup> +e <sup>-</sup> → *COC+H <sub>2</sub> O                                            | 0.12                 | 0.04                  |
| *COC+H <sup>+</sup> +e <sup>-</sup> → *CHCO                                                             | -1.46                | -0.35                 |
| *CHCO+H <sup>+</sup> +e <sup>-</sup> → *CHCHO                                                           | -0.19                | -0.98                 |
| *CHCHO+H <sup>+</sup> +e <sup>-</sup> → *CH <sub>2</sub> CHO                                            | 0.92                 | 0.35                  |
| *CH <sub>2</sub> CHO+H <sup>+</sup> +e <sup>-</sup> → *CH <sub>2</sub> CH <sub>2</sub> O                | -0.14                | -0.42                 |
| *O+H <sup>+</sup> +e <sup>-</sup> → *OH                                                                 | -0.91                | -1.22                 |
| *CH <sub>2</sub> CHO+H <sup>+</sup> +e <sup>-</sup> → *CH <sub>3</sub> CHO                              | 0.58                 | 0.49                  |
| CH <sub>3</sub> CHO+H <sup>+</sup> +e <sup>-</sup> → CH <sub>3</sub> CH <sub>2</sub> O                  | -1.13                | -1.28                 |
| *CH <sub>3</sub> CH <sub>2</sub> O+H <sup>+</sup> +e <sup>-</sup> → *CH <sub>3</sub> CH <sub>2</sub> OH | 1.69                 | 1.56                  |

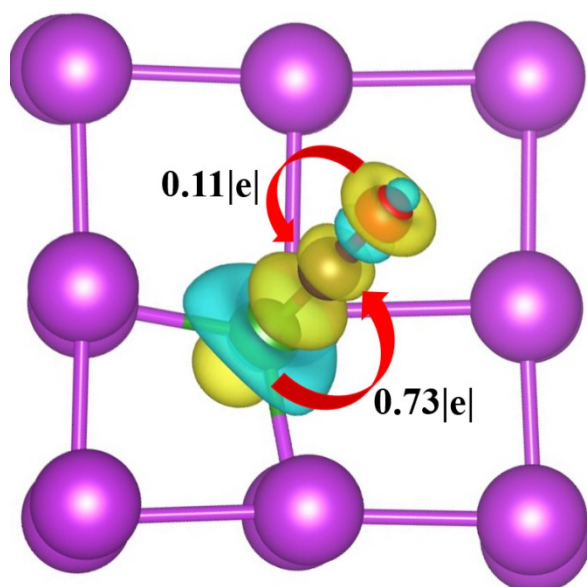

**Fig. S2** Local diagram Bader charge and charge density different (CDD) of the key intermediate \*CO. The accumulation and depletion are shown in yellow and blue, respectively. The isosurface value is taken as  $0.005 \text{ e}/\text{\AA}^{-3}$ .

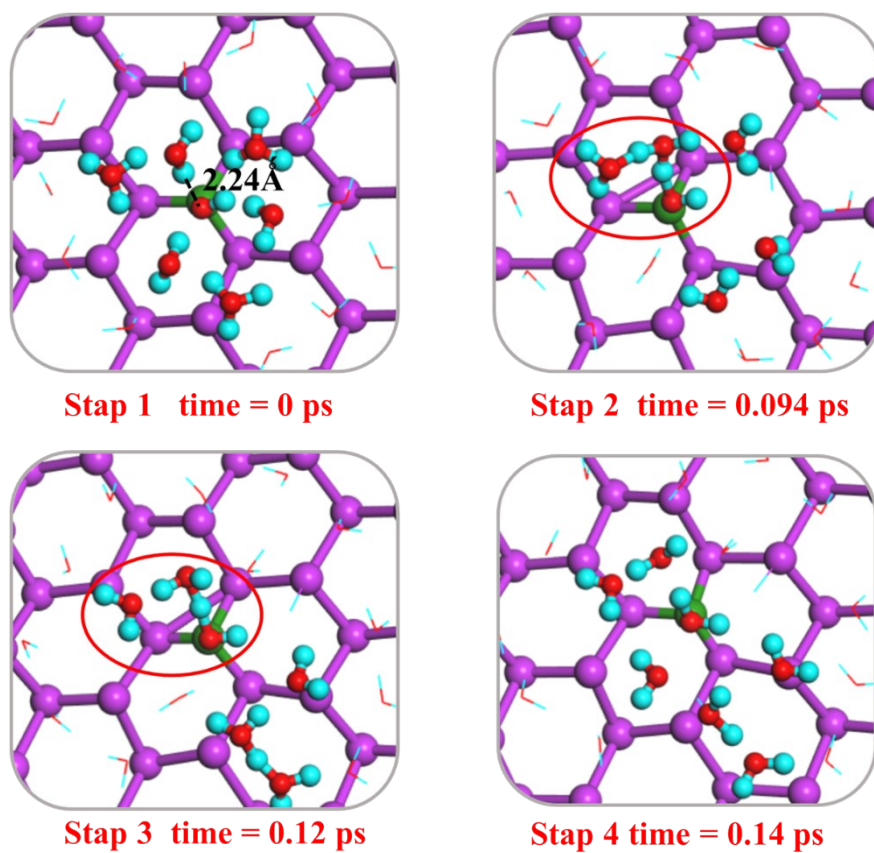

**Fig. S3** *Ab-initio* molecular dynamics calculation for the conversion of \*OH to H<sub>2</sub>O molecules under acidic condition on B@Bi catalyst. The color codes are: Bi, purple; B, green; O, red; H, blue.

(a)

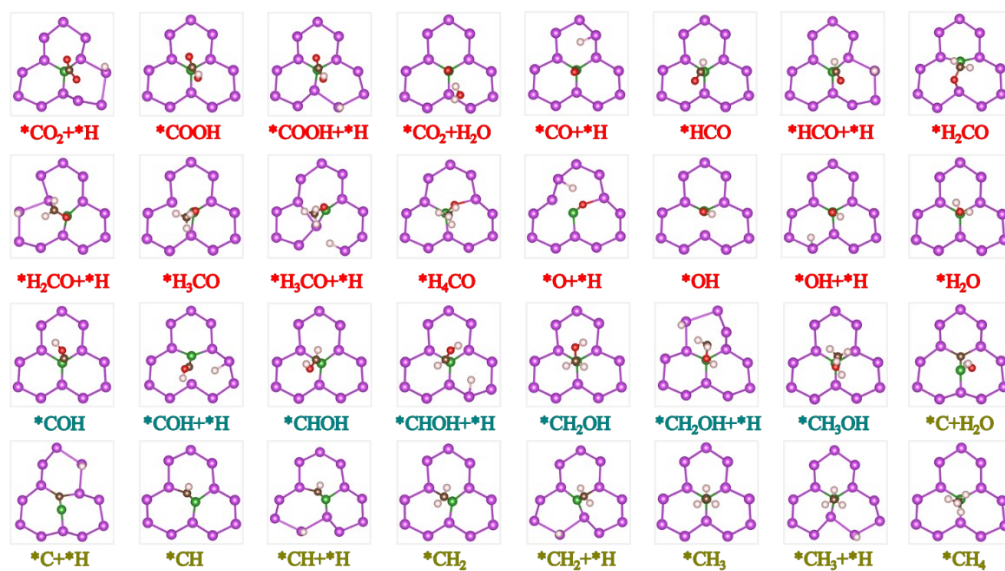

(b)

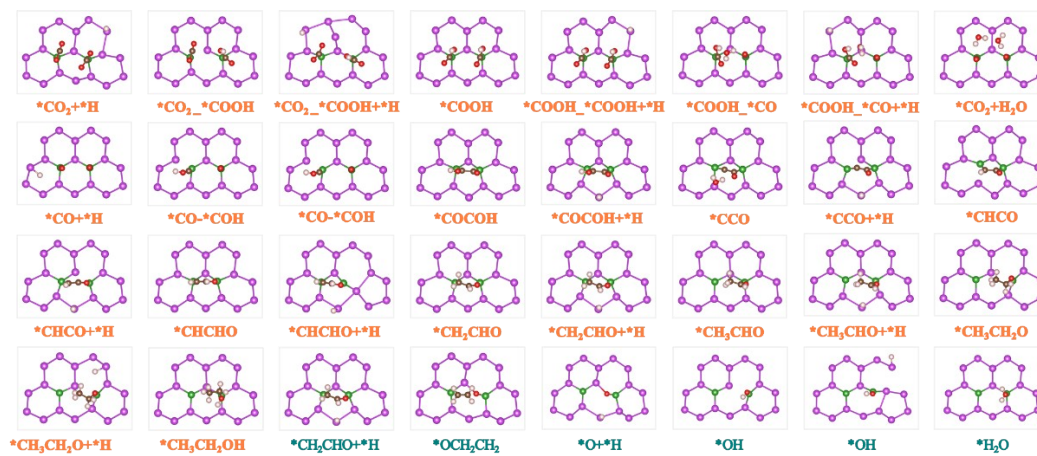

**Fig. S4** The optimized initial and final structure for the CO<sub>2</sub> reduction on B@Bi (a) and B<sub>2</sub>@Bi (b) catalyst.

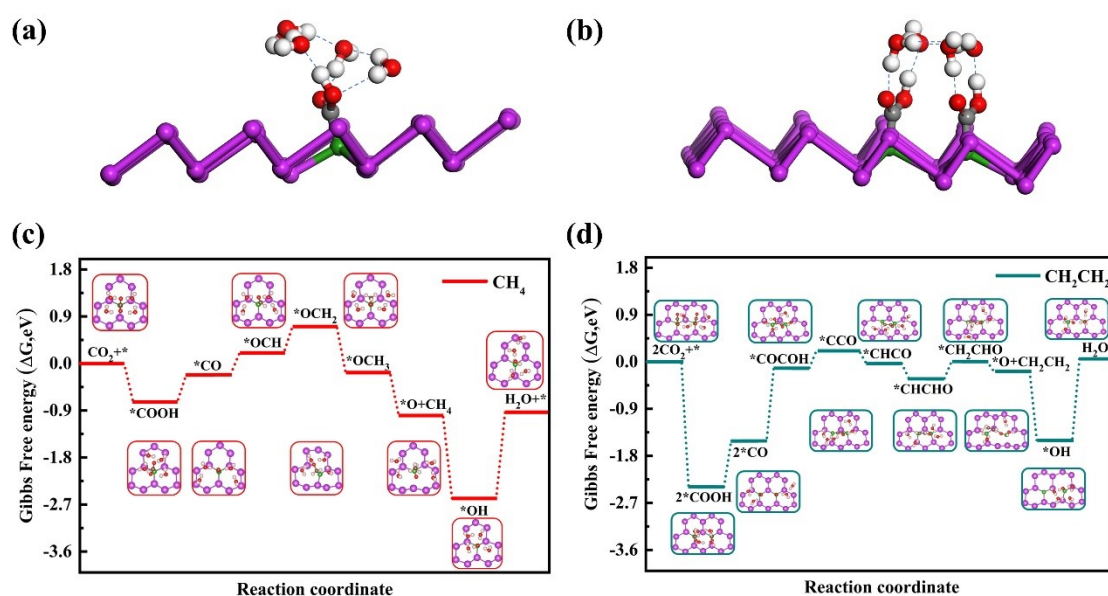

**Fig. S5** (a)-(b) The intermediate  $^*\text{COOH}$  adsorbed on  $\text{B@Bi}$  and  $\text{B}_2\text{@Bi}$  catalysts in 4  $\text{H}_2\text{O}$  environments. The blue dotted line represents the hydrogen bond. Color codes: Bi, purple; B, green; C, brown; O, red; H, white. The free energy distribution of the  $\text{CO}_2\text{RR}$  primitive steps of (c)  $\text{B@Bi}$  and (d)  $\text{B}_2\text{@Bi}$  in the water environment.

Two optimal reaction paths on  $\text{B@Bi}$  ( $\text{CH}_4$  path) and  $\text{B}_2\text{@Bi}$  ( $\text{CH}_2\text{CH}_2$  path) are further selected for exploring 4  $\text{H}_2\text{O}$  molecule environments to investigate the influence of  $\text{H}_2\text{O}$  molecules on the  $\text{CO}_2\text{RR}$  mechanism (Fig. S5 c and d). The free energy barrier of  $\text{CO}_2\text{RR}$  for both  $\text{B@Bi}$  and  $\text{B}_2\text{@Bi}$  decreases under the influence of  $\text{H}_2\text{O}$  molecules. On the other hand, the rate-limiting step of  $\text{CO}_2\text{RR}$  on the  $\text{B@Bi}$  is changed from the formation of the  $^*\text{OCH}$  (in the gas phase) to the  $^*\text{CO}$  (in the 4  $\text{H}_2\text{O}$  environments). At a zero electrode potential ( $U = 0 \text{ V}$ ), the polar intermediate  $^*\text{COOH}$  adsorbed on B atoms can form hydrogen bonds with 4  $\text{H}_2\text{O}$  molecules in Fig. S5 a and b, resulting in a low hydrogenation barrier. The protonation step of  $^*\text{COOH}$  from the intermediate  $^*\text{CO}$  requires energy barriers of 0.53 eV and 0.88 eV on  $\text{B@Bi}$  and  $\text{B}_2\text{@Bi}$ , respectively. Therefore, in the  $\text{CO}_2\text{RR}$ , the effect of hydrogen bonding on the stability of different polar intermediates cannot be ignored. According to the  $\Delta G$  values of 1.40



eV for the \*COCOH formation, the C–C coupling is considered significantly favorable to occur in \*COCOH on B<sub>2</sub>@Bi due to the involvement of H<sub>2</sub>O molecules. In the next hydrogenation step, \*COCOH is further protonated to \*CCO, \*CHCO, \*CHCHO, \*CH<sub>2</sub>CHO, and \*O+CH<sub>2</sub>CH<sub>2</sub> (gas), with  $\Delta G$  values of 0.33 eV, –0.24 eV, –0.30 eV, 0.33 eV and –0.19 eV, respectively. In addition, the overpotentials of the two CO<sub>2</sub>RR mechanisms have been calculated. The B@Bi exhibited low overpotentials of 0.28 V for CH<sub>4</sub> and the overpotential of CH<sub>2</sub>CH<sub>2</sub> formation on B<sub>2</sub>@Bi is 1.04 V. As a result, hydrogen bond interaction between the intermediates and water molecules promotes CO<sub>2</sub>RR protonation.

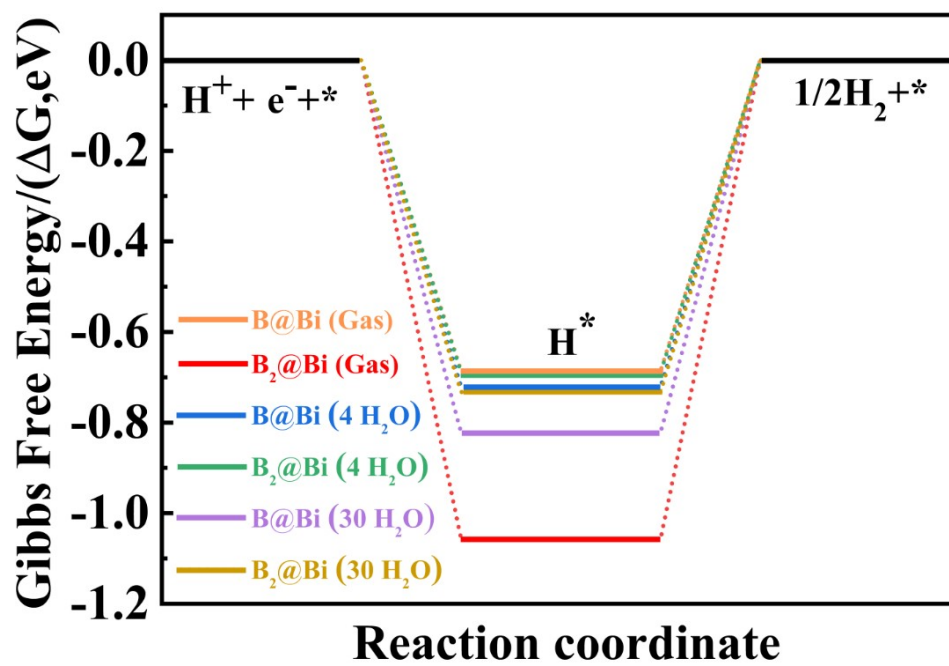

**Fig. S6** Free energy diagrams of HER on B@Bi and B<sub>2</sub>@Bi in the gas phase, 4 H<sub>2</sub>O and 30 H<sub>2</sub>O environment.

**Table.S3** The total energy, the zero-point correction energy (ZPE), and entropy (TS, T=298.15k) of the adsorbed species on B@Bi in the gas phase.

| Species             | E (eV)  | ZPE (eV) | TS (eV) |
|---------------------|---------|----------|---------|
| *COOH               | -222.13 | 0.64     | 0.19    |
| *CO                 | -211.65 | 0.24     | 0.10    |
| *OCH                | -214.49 | 0.48     | 0.15    |
| *OCH <sub>2</sub>   | -217.69 | 0.81     | 0.10    |
| *OCH <sub>3</sub>   | -222.85 | 1.13     | 0.15    |
| *O+CH <sub>4</sub>  | -227.30 | 1.32     | 0.22    |
| *OH                 | -206.29 | 0.09     | 0.21    |
| *COH                | -213.05 | 0.44     | 0.13    |
| *CHOH               | -218.28 | 0.83     | 0.13    |
| *CH <sub>2</sub> OH | -222.02 | 1.11     | 0.17    |
| *C                  | -202.39 | 0.11     | 0.03    |
| *CH                 | -206.44 | 0.37     | 0.05    |
| *CH <sub>2</sub>    | -211.60 | 0.69     | 0.06    |
| *CH <sub>3</sub>    | -215.58 | 0.99     | 0.09    |

**Table.S4** The total energy, the zero-point correction energy (ZPE), and entropy (TS, T=298.15k) of the adsorbed species on B<sub>2</sub>@Bi in the gas phase.

| Species                            | E (eV)  | ZPE (eV) | TS (eV) |
|------------------------------------|---------|----------|---------|
| 2*CO                               | -228.96 | 0.47     | 0.20    |
| *COCOH                             | -230.53 | 0.79     | 0.18    |
| *CCO                               | -234.02 | 0.99     | 0.24    |
| *CHCO                              | -224.97 | 0.65     | 0.13    |
| *CHCHO                             | -228.96 | 0.99     | 0.10    |
| *CH <sub>2</sub> CHO               | -231.74 | 1.25     | 0.13    |
| *CH <sub>3</sub> CHO               | -234.82 | 1.54     | 0.23    |
| *CH <sub>3</sub> CH <sub>2</sub> O | -239.79 | 1.89     | 0.18    |
| *O+CH <sub>2</sub> CH <sub>2</sub> | -235.52 | 1.48     | 0.18    |
| *OH                                | -206.86 | 0.39     | 0.07    |

**Table.S5** The total energy, the zero-point correction energy (ZPE), and entropy (TS, T=298.15k) of the adsorbed species on B@Bi in 4 H<sub>2</sub>O environmen.

| <b>Species</b>      | <b>E (eV)</b> | <b>ZPE (eV)</b> | <b>TS (eV)</b> |
|---------------------|---------------|-----------------|----------------|
| *COOH               | -280.96       | 0.64            | 0.14           |
| *CO                 | -269.82       | 0.23            | 0.09           |
| *OCH                | -273.16       | 0.52            | 0.09           |
| *OCH <sub>2</sub>   | -276.39       | 0.82            | 0.09           |
| *OCH <sub>3</sub>   | -281.01       | 1.14            | 0.14           |
| *O+ CH <sub>4</sub> | -285.40       | 1.32            | 0.24           |
| *OH                 | -265.56       | 0.39            | 0.04           |

**Table.S6** The total energy, the zero-point correction energy (ZPE), and entropy (TS, T=298.15k) of the adsorbed species on B<sub>2</sub>@Bi in 4 H<sub>2</sub>O environmen.

| <b>Species</b>                     | <b>E (eV)</b> | <b>ZPE (eV)</b> | <b>TS (eV)</b> |
|------------------------------------|---------------|-----------------|----------------|
| 2*CO                               | -287.18       | 0.47            | 0.19           |
| *COCOH                             | -289.58       | 0.79            | 0.14           |
| *CCO                               | -292.83       | 1.06            | 0.36           |
| *CHCO                              | -282.61       | 0.68            | 0.09           |
| *CHCHO                             | -286.67       | 0.10            | 0.10           |
| *CH <sub>2</sub> CHO               | -290.02       | 1.26            | 0.14           |
| *O+CH <sub>2</sub> CH <sub>2</sub> | -293.84       | 1.49            | 0.23           |
| *OH                                | -265.59       | 0.38            | 0.05           |

**Table.S7** The total energy, the zero-point correction energy (ZPE), and entropy (TS, T=298.15k) of the adsorbed species on B@Bi in 30 H<sub>2</sub>O environmen.

| <b>Species</b>      | <b>E (eV)</b> | <b>ZPE (eV)</b> | <b>TS (eV)</b> |
|---------------------|---------------|-----------------|----------------|
| *COOH               | -663.35       | 0.63            | 0.13           |
| *CO                 | -652.36       | 0.23            | 0.10           |
| *OCH                | -655.75       | 0.51            | 0.10           |
| *OCH <sub>2</sub>   | -659.00       | 0.82            | 0.09           |
| *OCH <sub>3</sub>   | -663.63       | 1.15            | 0.12           |
| *O+ CH <sub>4</sub> | -666.83       | 1.32            | 0.24           |
| *OH                 | -647.37       | 0.40            | 0.05           |

**Table.S6** The total energy, the zero-point correction energy (ZPE), and entropy (TS, T=298.15k) of the adsorbed species on B<sub>2</sub>@Bi in 30 H<sub>2</sub>O environment.

| Species                            | E (eV)  | ZPE (eV) | TS (eV) |
|------------------------------------|---------|----------|---------|
| 2*CO                               | -669.41 | 0.46     | 0.23    |
| *COCOH                             | -671.98 | 0.79     | 0.15    |
| *CCO                               | -675.36 | 1.04     | 0.19    |
| *CHCO                              | -664.76 | 0.66     | 0.10    |
| *CHCHO                             | -668.95 | 0.98     | 0.11    |
| *CH <sub>2</sub> CHO               | -672.37 | 1.25     | 0.14    |
| *O+CH <sub>2</sub> CH <sub>2</sub> | -676.06 | 1.49     | 0.24    |
| *OH                                | -648.34 | 0.38     | 0.05    |
